# Supplementary material for: Green Synthesis of Platinum and Palladium Nanoparticles Using Peganum harmala L. Seed Alkaloids: Biological and Computational Studies
Source: MDPI journal article supplement (doi:10.3390/nano11040965), 2021-04-09
Supplement: s1 [file s1]

**Green Synthesis of Platinum and Palladium Nanoparticles**  
**Using *Peganum harmala* L. Seed Alkaloids: Biological and Computational Studies**

Sherif Ashraf Fahmy<sup>1,2</sup>, Iten M. Fawzy<sup>3</sup>, Basma M. Saleh<sup>1</sup>, Marwa Y. Issa<sup>4</sup>, Udo Bakowsky<sup>\*5</sup>,  
Hassan Mohamed El-Said Azzazy<sup>\*1</sup>

<sup>1</sup>Department of Chemistry, School of Sciences & Engineering, The American University in  
Cairo, AUC Avenue, P.O. Box 74, New Cairo 11835, Egypt

<sup>2</sup>School of Life and Medical Sciences, University of Hertfordshire Hosted By Global Academic  
Foundation, R5 New Garden City, New Capital AL109AB, Cairo, Egypt

<sup>3</sup>Pharmaceutical Chemistry Department, Faculty of Pharmaceutical Sciences and Pharmaceutical  
Industries, Future University in Egypt, Cairo 12311, Egypt

<sup>4</sup>Department of Pharmacognosy, Faculty of Pharmacy, Cairo University, Kasr El-Aini Street,  
Cairo 11562, Egypt

<sup>5</sup>Department of Pharmaceutics and Biopharmaceutics, University of Marburg, Robert-Koch-Str.  
4, 35037 Marburg, Germany

**Correspondence:**

ubakowsky@aol.com (U.B.); hazzazy@aucegypt.edu (H.M.E.-S.A.); Tel.: +49-(0)-6421-28-2-  
58-84 (U.B.); +2 02 2615 2559 (H.M.E.-S.A.); Fax: +2-02-2795-7565 (H.M.E.-S.A.)

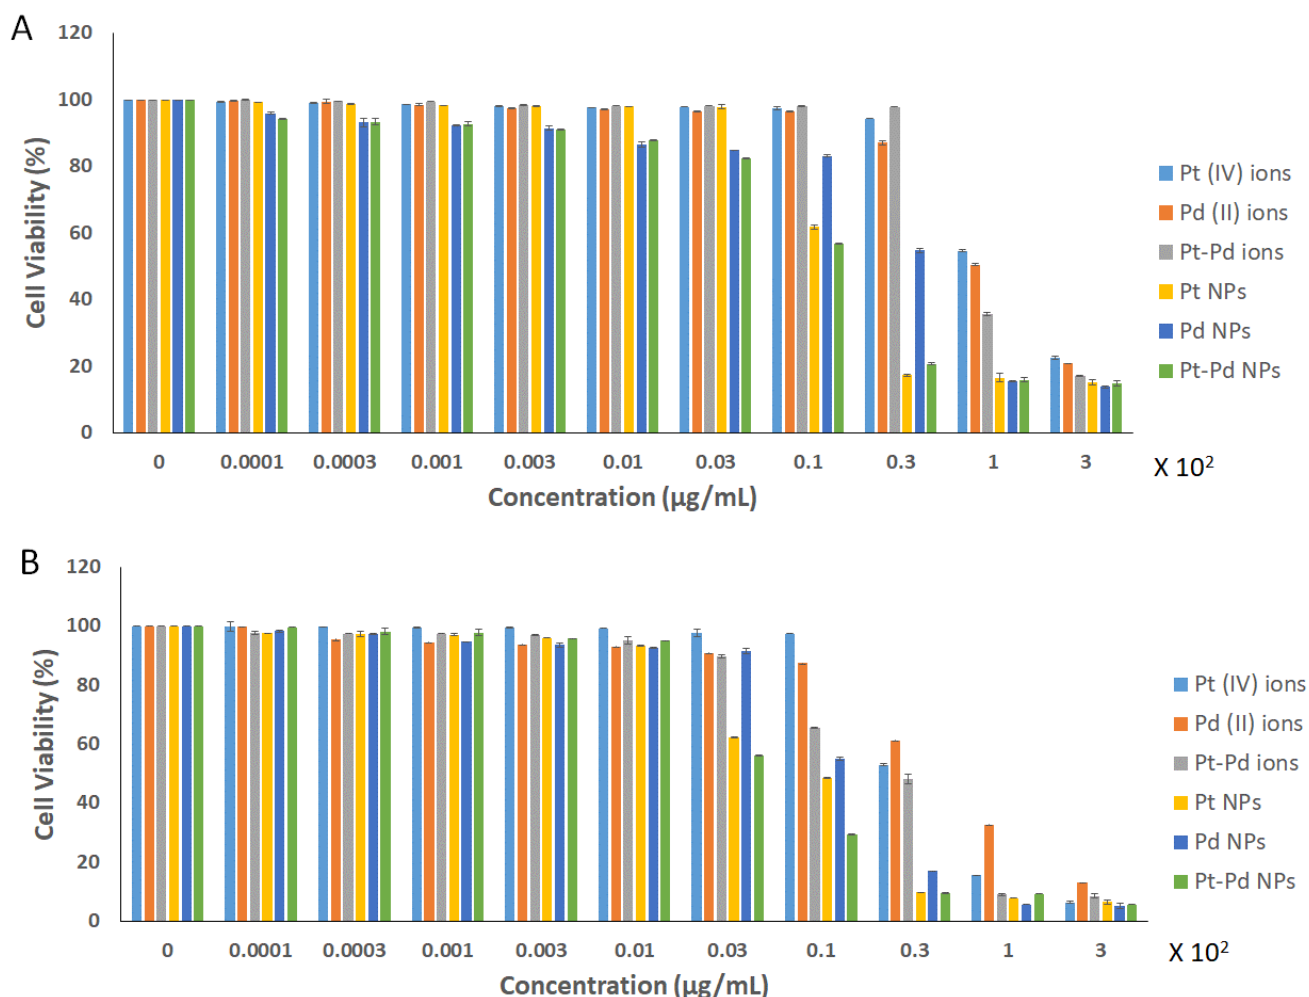

**Figure S1.** Evaluating the cytotoxicity of Pt NPs, Pd NPs, and Pt-Pd NPs compared to the individual metals ions at various concentrations ranging from 0.01 to 300 μg/mL using SRB assay in (A) A549 and (B) MCF-7 cells. An overall statistically significant decrease in cell viability was observed with the nanoparticles compared to individual metal ions ( $p < 0.05$ ). Untreated cells were used as negative control and considered as 100%. All experiments were carried out in triplicates, and the mean values were calculated. Error bars represent  $\pm$  standard deviation.

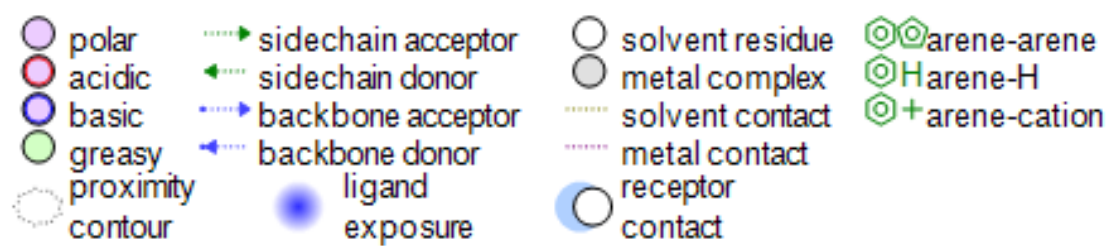

**Figure S2.** Color map of interaction modes between ligands and enzymes provided by MOE v. 2010.

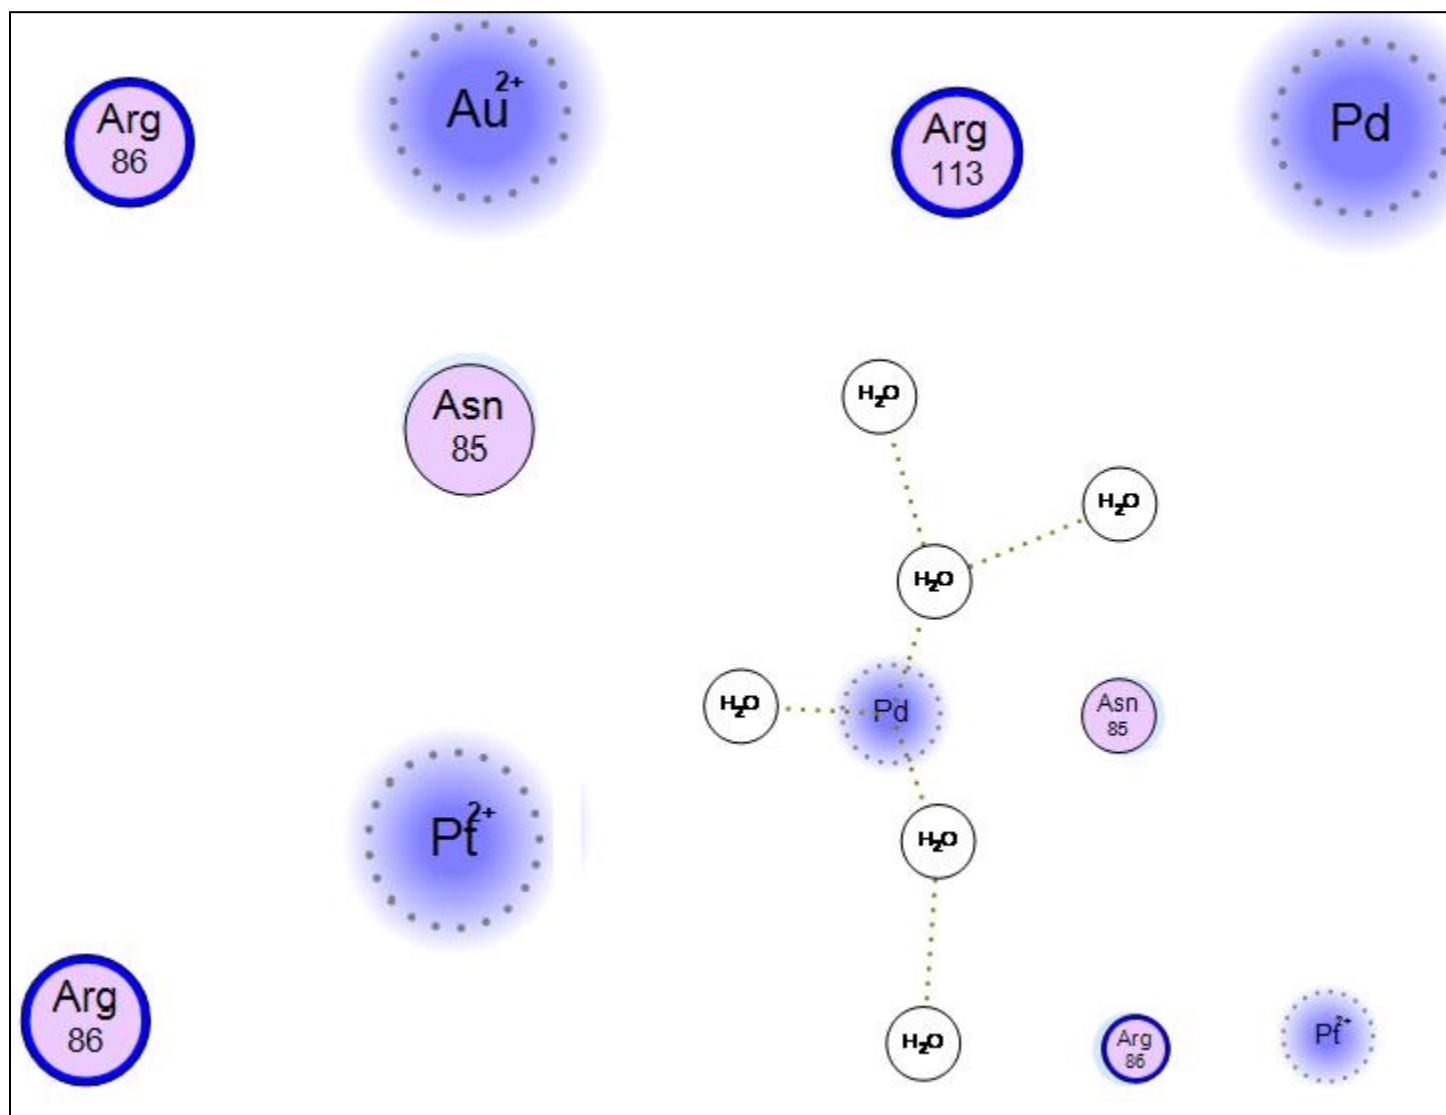

**Figure S3:** 2D interaction-ligand exposure between the four metal dynamic designed nanoparticles ( $\text{Au}^{+2}$  NPs and tested metals;  $\text{Pd}^0$  NPs,  $\text{Pt}^{+2}$  NPs and  $\text{Pd}^0$ - $\text{Pt}^{+2}$  mixture NPs) and key amino acids of cysteine proteinase displayed by MOE v.2010.

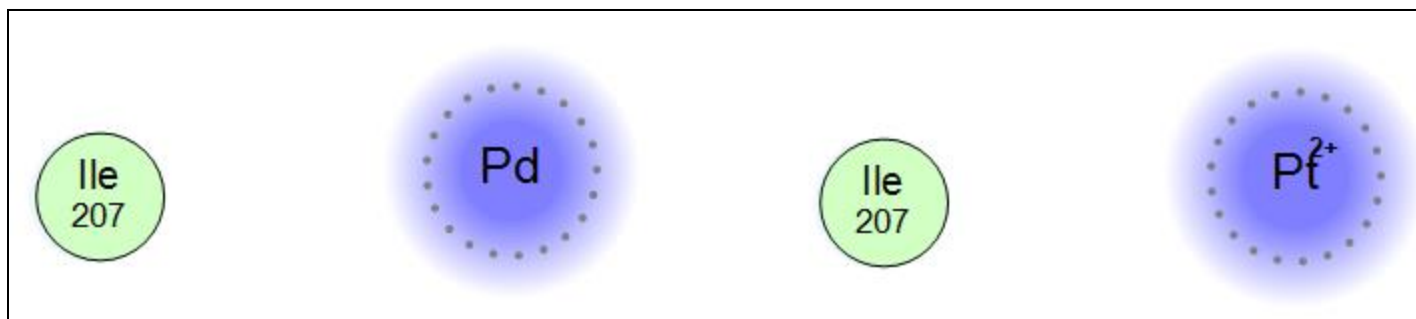

**Figure S4:** 2D interaction-ligand exposure between Pd<sup>0</sup>NPs and Pt<sup>2+</sup> NPs designed dynamic models and key amino acids of superoxide dismutase displayed by MOE v.201
